# Supplementary material for: Glutamine-driven oxidative phosphorylation is a major ATP source in transformed mammalian cells in both normoxia and hypoxia
Source: PubMed Central journal article supplement — Mol Syst Biol. 2013 Dec 3;9:712. doi: 10.1038/msb.2013.65 (PMC3882799; doi:10.1038/msb.2013.65), 2013-12-03
Supplement: msb201365-s1.pdf [file msb201365-s1.pdf]

# Supplementary Information

## **Table of contents:**

- Supplementary Figure 1-9 with legends
- Supplementary Table 1-5

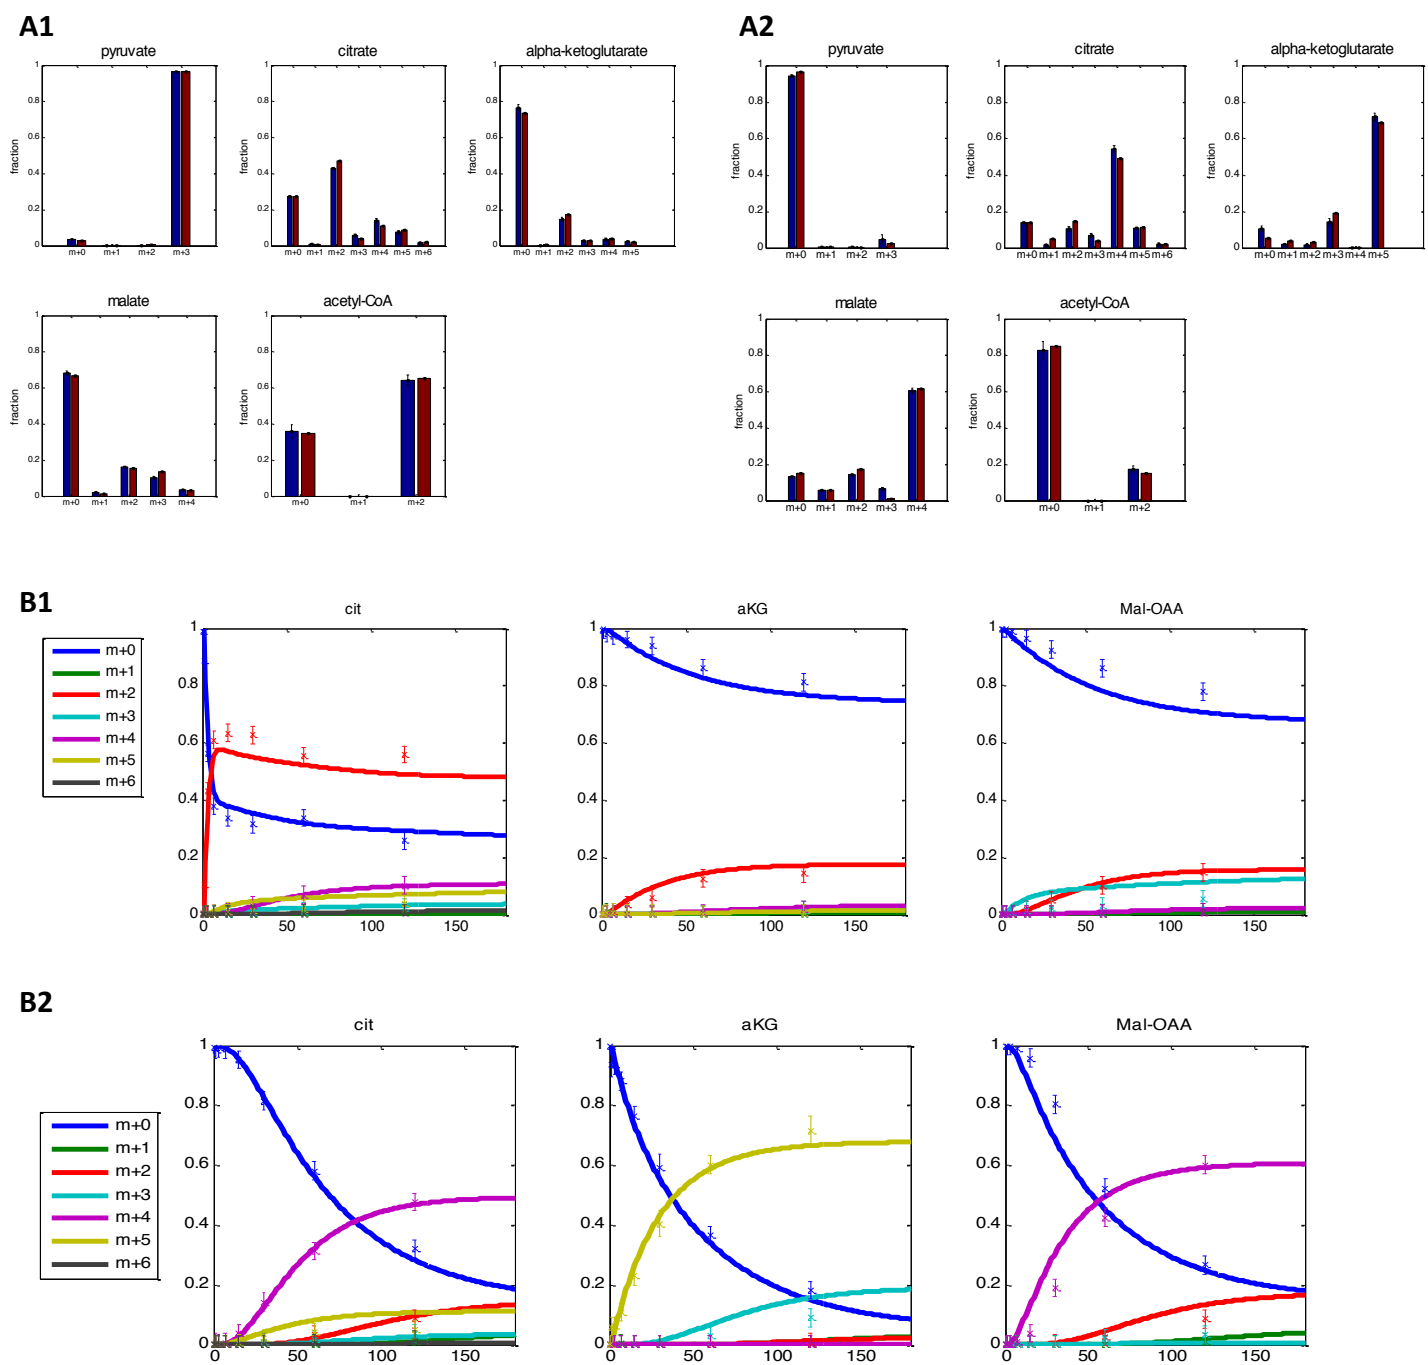

**Supplementary Figure 1. Metabolite labeling patterns in parental cell line in normoxia. (A)** Measured (blue bars) and simulated (red bars) steady-state labeling patterns for indicated metabolites after 72 h of cell growth in U-<sup>13</sup>C-glucose (A1) or U-<sup>13</sup>C-glutamine (A2). **(B)** Kinetic flux profiling after switch to U-<sup>13</sup>C-glucose (B1) or U-<sup>13</sup>C-glutamine (B2). Points are experimental data (mean ± 2 SD, N=2-4) and lines are simulation output.

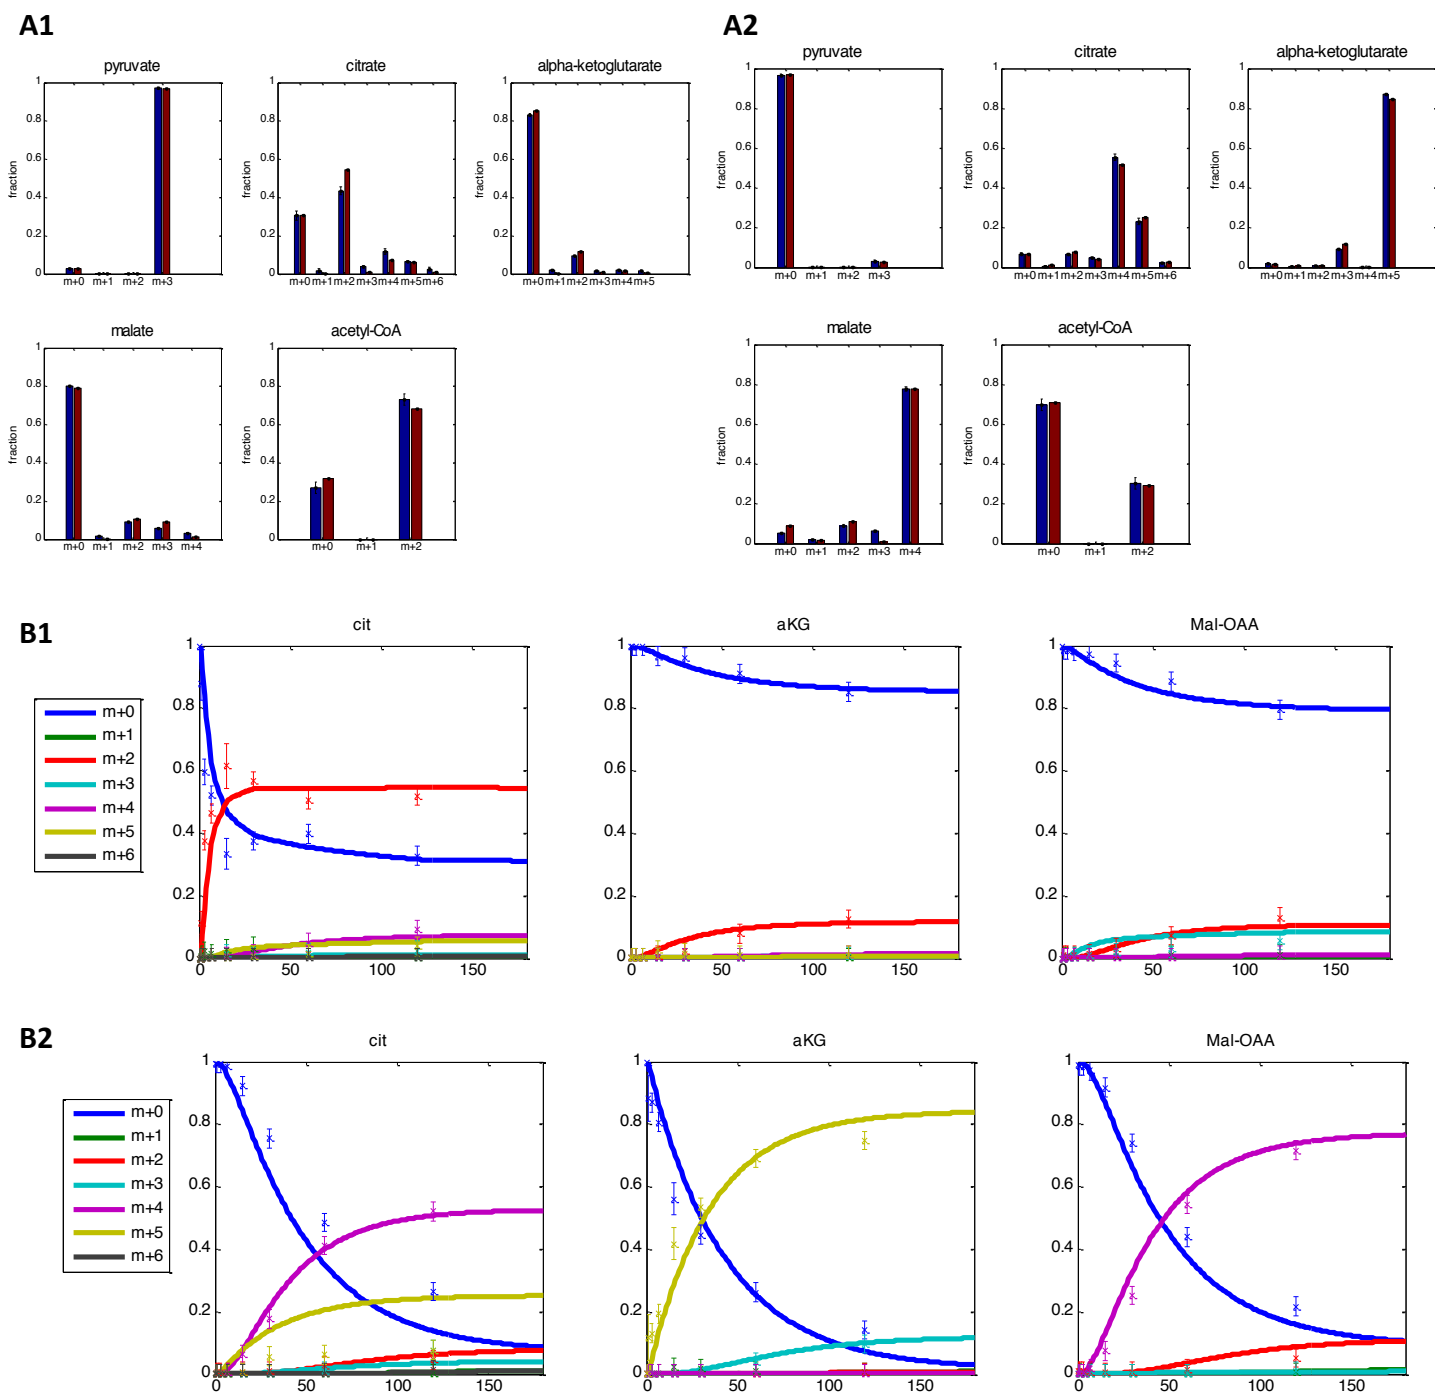

**Supplementary Figure 2. Metabolite labeling patterns in Ras cell line in normoxia. (A)** Measured (blue bars) and simulated (red bars) steady-state labeling patterns for indicated metabolites after 72 h of cell growth in U-<sup>13</sup>C-glucose (A1) or U-<sup>13</sup>C-glutamine (A2). **(B)** Kinetic flux profiling after switch to U-<sup>13</sup>C-glucose (B1) or U-<sup>13</sup>C-glutamine (B2). Points are experimental data (mean  $\pm$  2 SD, N=2-4) and lines are simulation output.

**A1**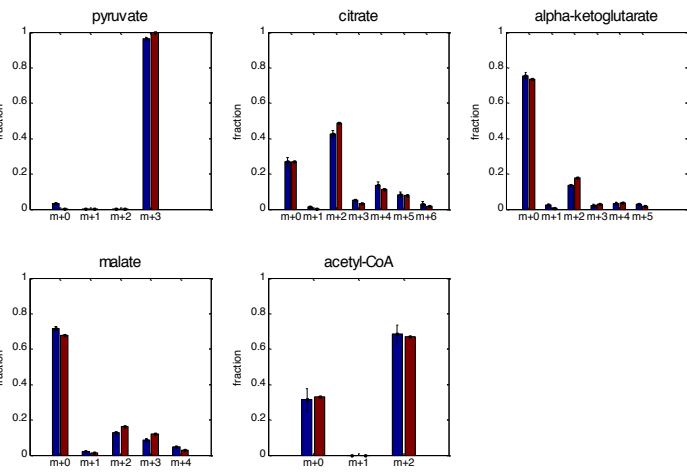**A2**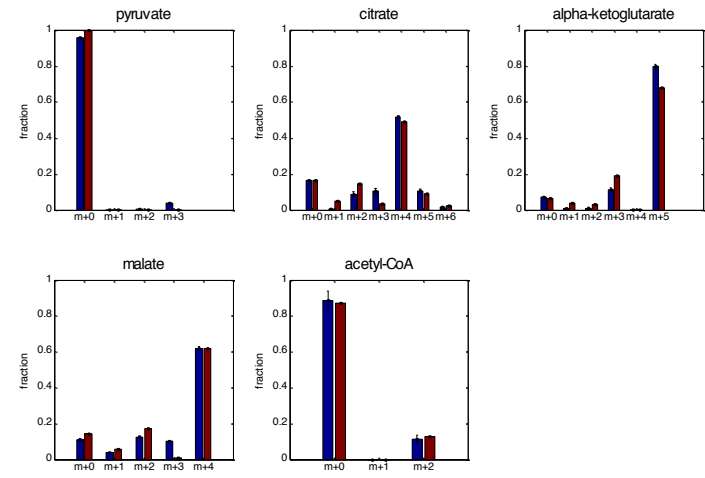**B1**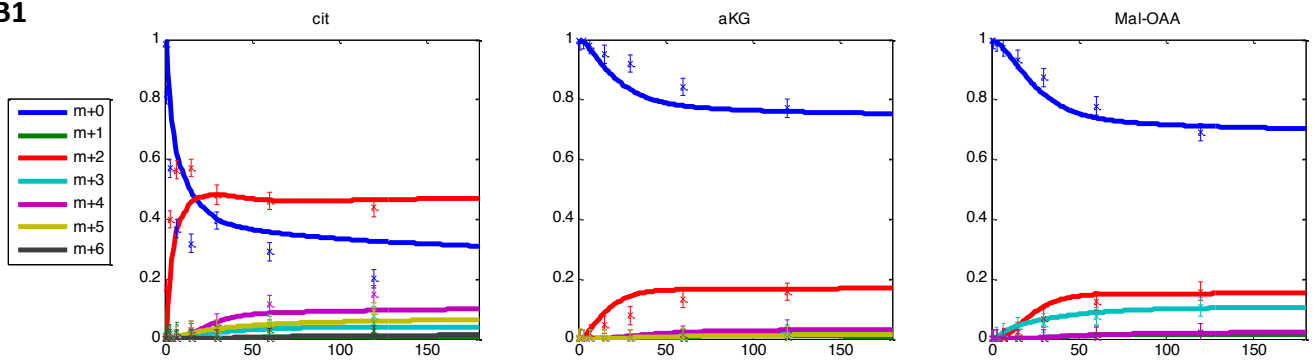**B2**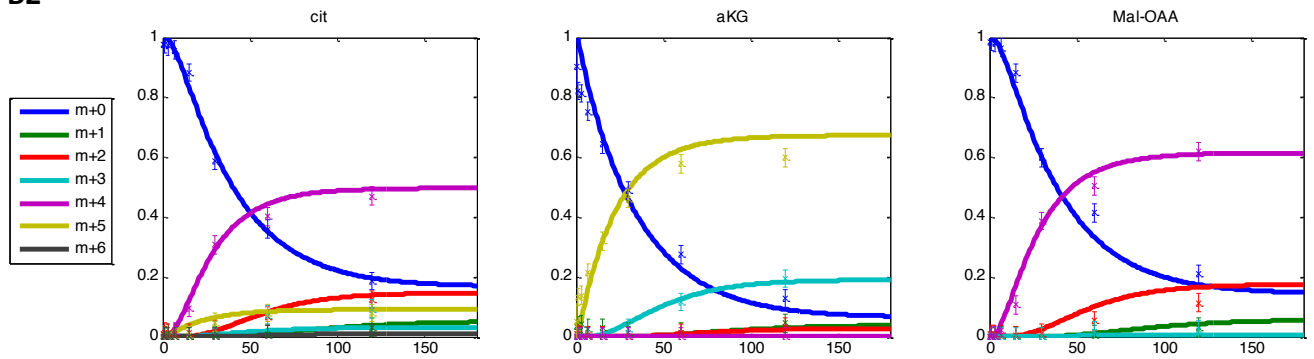

**Supplementary Figure 3. Metabolite labeling patterns in Akt cell line in normoxia. (A)** Measured (blue bars) and simulated (red bars) steady-state labeling patterns for indicated metabolites after 72 h of cell growth in  $\text{U-}^{13}\text{C}$ -glucose (A1) or  $\text{U-}^{13}\text{C}$ -glutamine (A2). **(B)** Kinetic flux profiling after switch to  $\text{U-}^{13}\text{C}$ -glucose (B1) or  $\text{U-}^{13}\text{C}$ -glutamine (B2). Points are experimental data (mean  $\pm$  2 SD, N=2-4) and lines are simulation output.

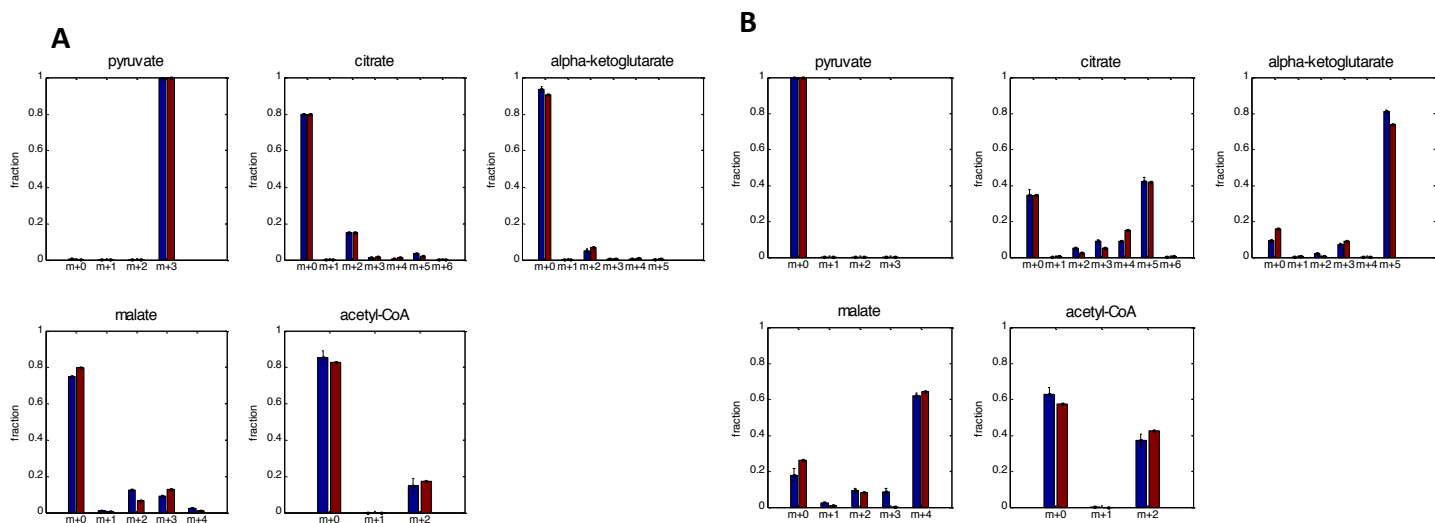

**Supplementary Figure 4. Metabolite labeling patterns in parental cell line in hypoxia.** Measured (blue bars) and simulated (red bars) steady-state labeling patterns for indicated metabolites after 72 h of cell growth in U-<sup>13</sup>C-glucose (A) or U-<sup>13</sup>C-glutamine (B).

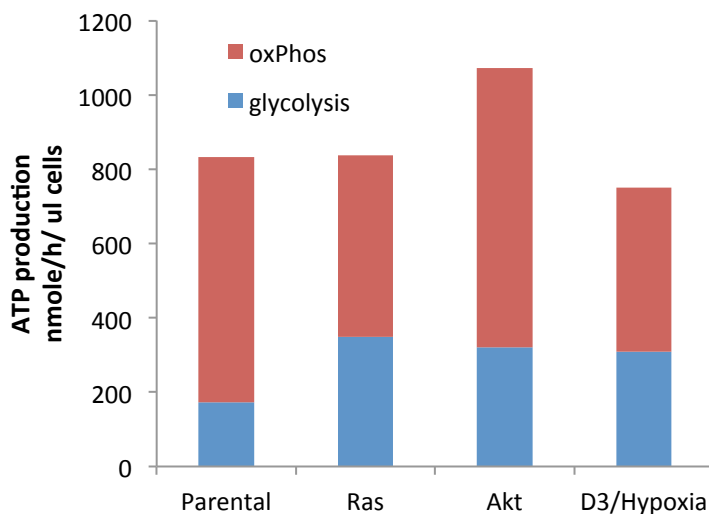

**Supplementary Figure 5. ATP production rates from oxidative phosphorylation and glycolysis in parental, Ras, Akt iBMK cells in normoxia and parental cells in hypoxia.** Oxidative ATP production rate is calculated based on the assumption that all cytosolic NADH are shuttled into mitochondrial through glycerol-phosphate shuttle, thus it is a lower bound of oxidative ATP production.

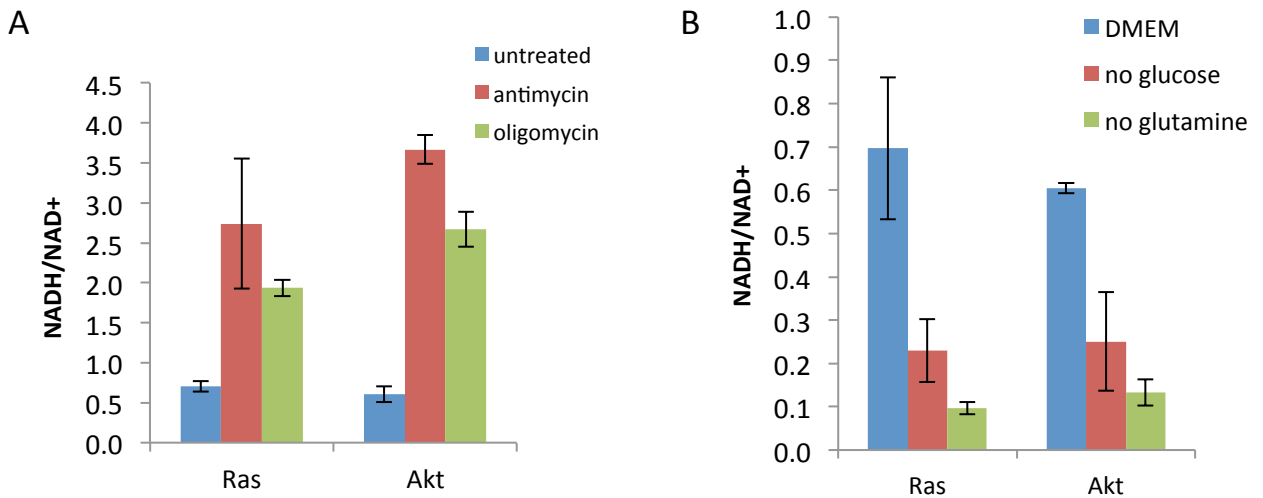

**Supplementary Figure 6.** (A) Effect of oxidative phosphorylation inhibitors on the NADH/NAD<sup>+</sup> ratio in Ras and Akt-driven cells in normoxia. NADH and NAD<sup>+</sup> levels were measured 5 min after addition of vehicle (DMSO), the complex III inhibitor antimycin A (4 μg/ml) or the ATP synthase inhibitor oligomycin (8 μg/ml) (mean ± SD of N = 3). (B) NADH/NAD<sup>+</sup> ratio in Ras and Akt in normoxia measured after switching cells to complete media or media lacking glucose or glutamine for 8 hours (mean ± SD of N = 3).

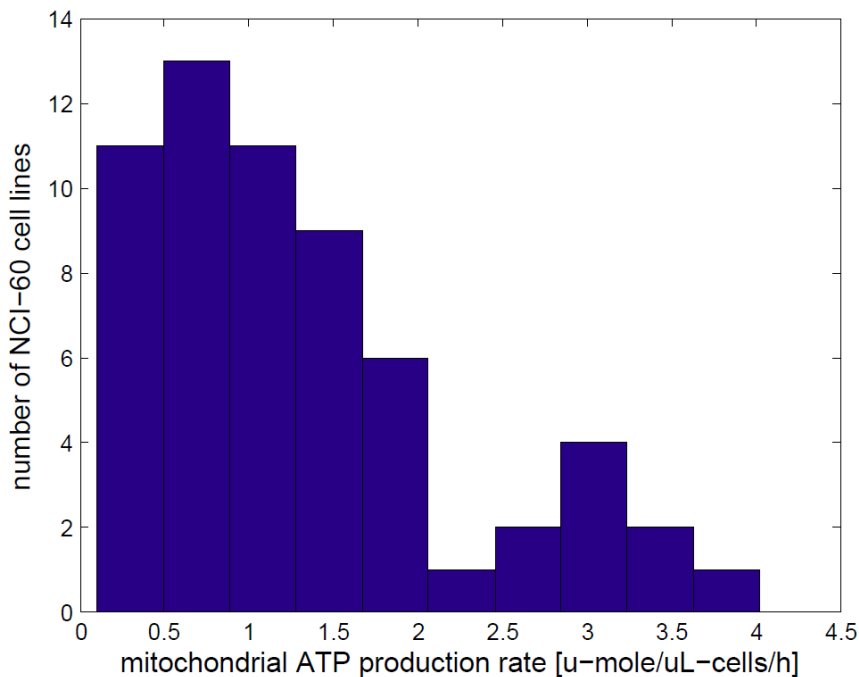

**Supplementary Figure 7.** Rates of ATP production by oxidative phosphorylation across the NCI-60 cell lines predicted based on flux balance analysis using the glycolysis and TCA cycle reaction network shown in Supplementary Table 4 and constrained by experimental data on metabolite uptake and excretion rates from Jain et al.

A

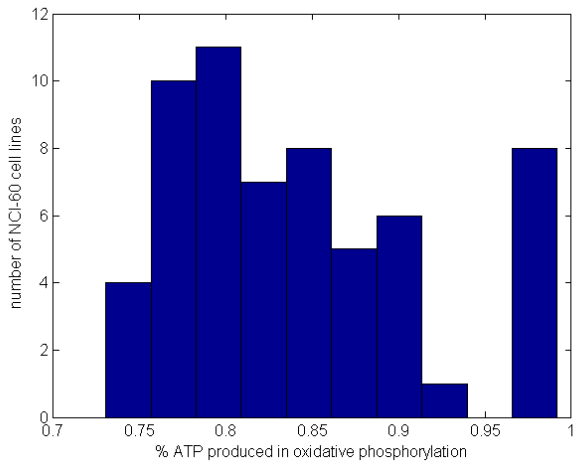

B

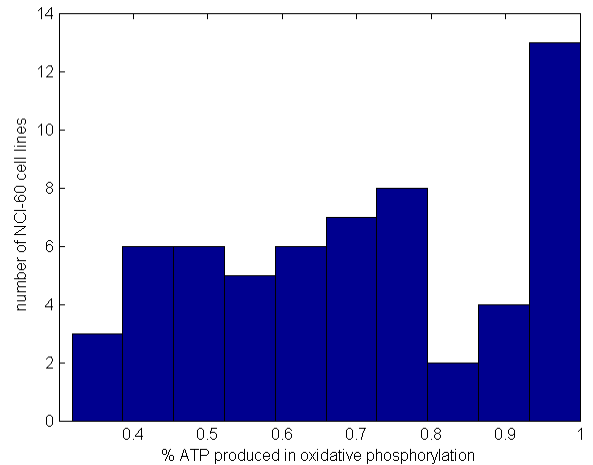

**Supplementary Figure 8.** Rates of ATP production by oxidative phosphorylation across the NCI-60 cell lines predicted based on flux balance analysis using a genome-scale metabolic model and constrained by experimental data on metabolite uptake and excretion rates from Jain et al. and biomass production rates. (A) With optimization of total ATP production. (B) With constraining oxygen consumption rates to a reasonable range without maximizing ATP production.

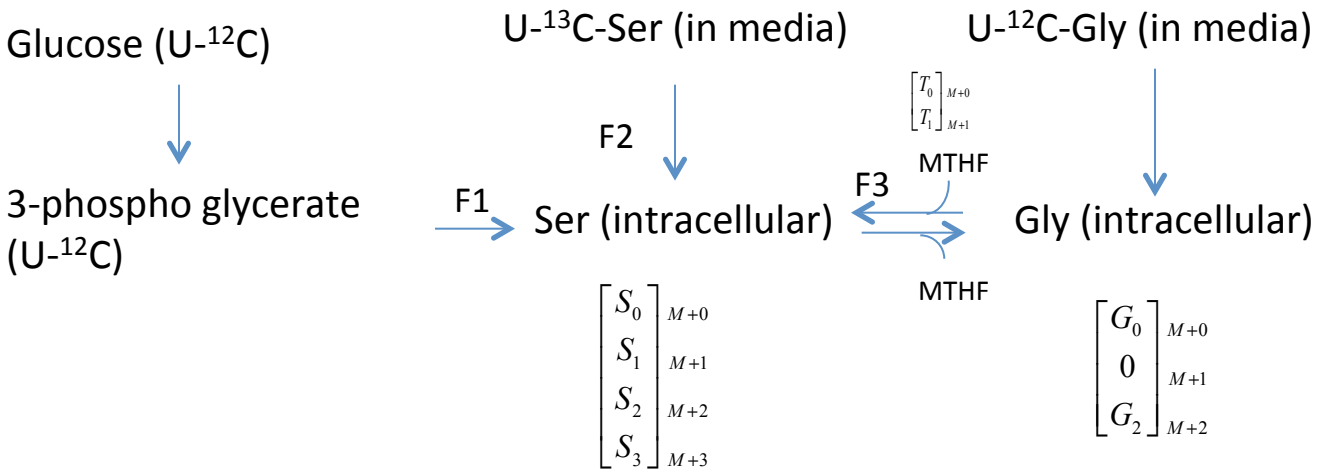

**Supplementary Figure 9.** Model to quantify *de novo* serine synthesis flux.

**Supplementary Table 1.** Doubling time of iBMK cells

|                   | Parental | Ras | Akt | Parental-hypoxia |
|-------------------|----------|-----|-----|------------------|
| doubling time / h | 24       | 22  | 21  | 48               |

**Supplementary Table 2. Fatty acid contents in iBMK cells.** Fatty acid contents in units of nmole/  $\mu$ l cells.

|       | Parental | Ras | Akt | Parental-hypoxia |
|-------|----------|-----|-----|------------------|
| C16:0 | 5.5      | 7.8 | 8.1 | 10.2             |
| C16:1 | 1.6      | 3.1 | 2.2 | 1.3              |
| C18:0 | 2.8      | 3.0 | 4.4 | 7.8              |
| C18:1 | 6.9      | 8.8 | 8.1 | 10.7             |



**Supplementary Table 3. Metabolic flux distributions of parental, Ras, Akt cells in normoxia and parental iBMK cells in hypoxia.** Fluxes are obtained as described in the Methods. The table shows the best estimate and standard deviation. Fluxes are in units of nmole/ (h \*  $\mu$ l cells).

| Reaction | Reaction description                                                                                  | Atom mapping                | Constrained | Fluxes   |       |       |                    | Fluxes STD |      |      |                    |
|----------|-------------------------------------------------------------------------------------------------------|-----------------------------|-------------|----------|-------|-------|--------------------|------------|------|------|--------------------|
|          |                                                                                                       |                             |             | Parental | Ras   | Akt   | Parental - hypoxia | Parental   | Ras  | Akt  | Parental - hypoxia |
| F1       | 1/2 glucose.ext -> pyruvate                                                                           | abc->abc                    | 1           | 172.6    | 349.7 | 320.2 | 309.7              | 7.8        | 25.2 | 32.7 | 0.1                |
| F2       | pyruvate + NAD <sup>+</sup> -> acetyl-CoA (m) + CO <sub>2</sub> + NADH                                | abc->bc + a                 | 0           | 20.5     | 10.8  | 24.5  | 4.7                | <0.1       | 0.5  | 0.1  | 0.2                |
| F3       | acetyl-CoA (m) + malate + NAD <sup>+</sup> -> citrate + NADH                                          | abcd+ef->dcbfea             | 0           | 26.4     | 11.3  | 30.4  | 8.4                | <0.1       | 0.5  | 0.1  | 0.5                |
| F4       | citrate + NAD <sup>+</sup> -> alpha-ketoglutarate + CO <sub>2</sub> + NADH                            | abcdef->abcde+f             | 0           | 30.0     | 14.8  | 32.6  | 35.2               | 0.1        | 0.9  | 0.1  | 1.1                |
| F5       | alpha-ketoglutarate + CO <sub>2</sub> + NADH -> citrate + NAD <sup>+</sup>                            | abcde+f->abcdef             | 0           | 5.3      | 4.9   | 5.0   | 20.1               | 0.6        | 0.4  | 0.7  | 1.3                |
| F6       | alpha-ketoglutarate + NAD <sup>+</sup> + FAD -> fumarate + CO <sub>2</sub> + NADH + FADH <sub>2</sub> | abcde->1/2 bcde + 1/2 edcb  | 0           | 77.2     | 64.6  | 84.6  | 57.1               | <0.1       | 1.7  | <0.1 | <0.1               |
| F7       | malate/OAA + NAD <sup>+</sup> -> pyruvate + CO <sub>2</sub> + NADH                                    | abcd -> abc                 | 0           | 7.2      | 12.0  | <0.1  | <0.1               | 3.8        | 8.0  | <0.1 | <0.1               |
| F8       | pyruvate + CO <sub>2</sub> + NADH -> malate/OAA + NAD <sup>+</sup>                                    | abc + d -> abcd             | 0           | 8.5      | 5.4   | 7.2   | 8.0                | 1.2        | 1.0  | 1.3  | 0.6                |
| F9       | citrate -> malate + acetyl-CoA (c).ext                                                                | abcdef -> fcba + ed         | 0           | 2.1      | 1.5   | 4.3   | 0.2                | 0.2        | 0.2  | 0.4  | 0.1                |
| F10      | other sources (e.g. fatty acid) -> acetyl-CoA (m)                                                     | ab -> ab                    | 0           | 5.9      | 0.5   | 5.9   | 3.7                | 0.8        | 0.7  | 0.9  | 0.7                |
| F11      | glutamine -> alpha-ketoglutarate                                                                      | abcde -> abcde              | 1           | 52.5     | 54.7  | 57.0  | 42.0               | <0.1       | 1.6  | <0.1 | 1.0                |
| F12      | pyruvate + NADH -> lactate.ext + NAD <sup>+</sup>                                                     | abc -> abc                  | 1           | 150.8    | 345.6 | 288.5 | 297.0              | 8.8        | 26.5 | 33.2 | 0.3                |
| F13      | malate+ NAD <sup>+</sup> -> OAA + NADH                                                                | abcd -> abcd                | 0           | 54.2     | 48.1  | 65.8  | 56.9               | 1.0        | 3.7  | 1.6  | 0.7                |
| F14      | acetyl-CoA (c) -> biomass                                                                             |                             | 1           | 2.1      | 1.5   | 4.3   | 0.2                | 0.2        | 0.1  | 0.4  | 0.1                |
| F15      | citrate.ext -> citrate                                                                                | abcdef -> abcdef            | 0           | 0.4      | 0.1   | 1.6   | 6.9                | 0.8        | 0.2  | 1.0  | 0.5                |
| F16      | fumarate <-> malate/OAA                                                                               | abcd -> 1/2 abcd + 1/2 dcba | 0           | 77.2     | 64.6  | 84.6  | 57.1               | <0.1       | 1.7  | <0.1 | <0.1               |
| F17      | 1/2 glucose + NAD -> serine + NADH                                                                    |                             | 1           | 5.6      | 4.0   | 9.6   | 0.4                | 0.6        | 1.2  | 2.3  | <0.1               |
| F18      | pyruvate -> pyruvate.ext                                                                              | abc -> abc                  | 1           | 17.0     | 16.0  | 20.0  | 12.0               | 6.1        | 8.8  | 7.7  | 4.6                |
| F19      | NADH + 1/2 O <sub>2</sub> => NAD                                                                      | abc -> abc                  | 1           | 306.2    | 224.1 | 351.5 | 204.5              | 0.0        | 6.3  | 0.0  | 0.0                |

**Supplementary Table 4. Metabolite concentrations in iBMK cells.** In units of nmole/  $\mu$ l cells.

|                           | Parental |       | Ras  |       | Akt  |       |
|---------------------------|----------|-------|------|-------|------|-------|
|                           | mean     | stdev | mean | stdev | mean | stdev |
| hexose-phosphate          | 0.8      | 0.2   | 1.2  | 0.2   | 0.8  | 0.03  |
| ribose-phosphate          | 0.04     | 0.03  | 0.05 | 0.01  | 0.05 | 0.01  |
| fructose-1,6-bisphosphate | 1.1      | 0.07  | 1.5  | 0.14  | 1.5  | 0.33  |
| 3-phosphate-glycerate     | 0.2      | 0.05  | 0.5  | 0.1   | 0.3  | 0.06  |
| pyruvate                  | 4.6      | 0.3   | 4.4  | 0.2   | 5.9  | 0.2   |
| acetyl-CoA                | 0.02     | 0.004 | 0.02 | 0.006 | 0.03 | 0.01  |
| fumarate                  | 0.3      | 0.06  | 0.4  | 0.06  | 0.3  | 0.01  |
| succinate                 | 0.2      | 0.04  | 0.2  | 0.1   | 0.3  | 0.03  |
| citrate                   | 0.9      | 0.02  | 0.4  | 0.07  | 0.9  | 0.11  |
| malate                    | 0.9      | 0.2   | 1.0  | 0.06  | 0.9  | 0.17  |
| aspartate                 | 10.5     | 0.7   | 10.3 | 4.3   | 10.7 | 4.9   |
| glutamate                 | 36.0     | 12    | 37.0 | 8     | 30.0 | 7     |
| alpha-ketoglutarate       | 0.4      | 0.01  | 0.4  | 0.13  | 0.4  | 0.07  |

**Supplementary Table 5. Constraints for MFA model**

|                                                                             | Parental - normoxia |        | RAS     |        | AKT     |        | Parental - hypoxia |        |
|-----------------------------------------------------------------------------|---------------------|--------|---------|--------|---------|--------|--------------------|--------|
|                                                                             | Average             | Std    | Average | Std    | Average | Std    | Average            | Std    |
| Glucose uptake ( $\mu\text{mole}/\mu\text{L cells/h}$ )                     | 0.098               | 0.008  | 0.183   | 0.020  | 0.170   | 0.020  | 0.157              | 0.006  |
| Glutamine uptake ( $\mu\text{mole}/\mu\text{L cells/h}$ )                   | 0.040               | 0.008  | 0.054   | 0.005  | 0.045   | 0.008  | 0.037              | 0.003  |
| Lactate secretion (F12) ( $\mu\text{mole}/\mu\text{L cells/h}$ )            | 0.143               | 0.014  | 0.340   | 0.040  | 0.270   | 0.050  | 0.295              | 0.011  |
| Pyruvate + alanine secretion (F18) ( $\mu\text{mole}/\mu\text{L cells/h}$ ) | 0.017               | 0.003  | 0.016   | 0.005  | 0.020   | 0.005  | 0.012              | 0.003  |
| O <sub>2</sub> consumption by OxPhos (F19) (nmole/ $\mu\text{L cells/h}$ )  | 170.100             | 16.200 | 124.500 | 16.600 | 195.300 | 27.900 | 113.581            | 19.567 |
| Demand flux: glucose to ribose (nmole/ $\mu\text{L cells/h}$ )              | 2.900               | 0.580  | 3.163   | 0.633  | 3.103   | 0.621  | 1.450              | 0.290  |
| Demand flux: proteomic gln/glu/pro (nmole/ $\mu\text{L cells/h}$ )          | 2.846               | 0.569  | 3.105   | 0.621  | 3.252   | 0.650  | 1.423              | 0.285  |
| Demand flux: acetyl-CoA (F14) (nmole/ $\mu\text{L cells/h}$ )               | 2.077               | 0.415  | 1.958   | 0.392  | 4.806   | 0.961  | 0.200              | 0.040  |
| Demand flux: serine biosynthesis (F17) (nmole/ $\mu\text{L cells/h}$ )      | 5.430               | 0.600  | 3.980   | 0.840  | 6.480   | 1.780  | 0.430              | 0.030  |
